# Supplementary material
Source: publisher figshare collection journal article supplement (https://gsajournals.figshare.com/ndownloader/files/15604205)
Supplement: Supplementary file 1 [file 15604205]

## Sheet: Positional Gene Enrichment
Table S7 Positional Gene Enrichment analysis of the 217 MAT Top Hits, 100 MAT and MET15 Top Hits, and 91 genes identified in 2+ independent studies
217 MAT Top Hits Positional Gene Enrichment
Chromosome Number	Region BP Start	Region BP End	Raw P-value	Adj. P-value (FDR)	# Elements identified	Total # Elements in Region
V	375211	424307	9.11204e-07	0.000231256	8	24
II	501798	545972	3.2271e-06	0.000274542	7	20
IX	255113	270572	1.58542e-05	0.000440188	5	10
V	417277	424307	0.000115314	0.000956874	3	3
XV	69376	139045	0.000568157	0.00288355	7	46
VII	67598	98589	0.000743057	0.00357881	5	23
IV	1474966	1478349	0.00175495	0.00686539	2	2
V	387228	390048	0.00175495	0.00686539	2	2
X	419849	421657	0.00175495	0.00686539	2	2
XII	815810	817761	0.00175495	0.00686539	2	2
XIV	351388	352019	0.00175495	0.00686539	2	2
XV	69376	70545	0.00175495	0.00686539	2	2
XV	114138	117454	0.00175495	0.00686539	2	2
XVI	381962	384405	0.00175495	0.00686539	2	2
XI	577829	586351	0.0019567	0.00750866	3	8
II	174923	182097	0.0038709	0.0122622	2	3
II	450875	454524	0.0038709	0.0122622	2	3
IV	425999	430923	0.0038709	0.0122622	2	3
VII	83649	87301	0.0038709	0.0122622	2	3
XI	581925	586351	0.0038709	0.0122622	2	3
XII	265457	267724	0.0038709	0.0122622	2	3
IV	852530	856811	0.00674644	0.0187313	2	4
VII	67598	73710	0.00674644	0.0187313	2	4
X	207873	218852	0.00674644	0.0187313	2	4
XIII	506995	511074	0.00674644	0.0187313	2	4
XV	869207	877037	0.00674644	0.0187313	2	4
II	568847	575991	0.0103348	0.0250155	2	5
IV	501097	509106	0.0103348	0.0250155	2	5
IX	193592	200116	0.0103348	0.0250155	2	5
V	484783	491953	0.0103348	0.0250155	2	5
V	551468	560360	0.0103348	0.0250155	2	5
XII	728957	733878	0.0103348	0.0250155	2	5
XV	461504	466545	0.0103348	0.0250155	2	5
X	638226	644095	0.0145912	0.0321825	2	6
IV	626705	643834	0.0194731	0.0403127	2	7
IV	1213896	1223323	0.0194731	0.0403127	2	7
IX	99860	122071	0.0194731	0.0403127	2	7
IV	273653	286695	0.0249396	0.0465276	2	8
IV	1353717	1365654	0.0249396	0.0465276	2	8
VII	542207	553955	0.0249396	0.0465276	2	8
XII	700001	708147	0.0249396	0.0465276	2	8
100 MAT & MET15 Top Hits Positional Gene Enrichment
Chr	BP Region Start	BP Region End	Raw P-value	Adj. P-value (FDR)	# Elements Hit	# Elements in Region
V	387228	560360	1.1764e-07	9.69404e-06	11	100
II	504848	545972	1.05324e-07	9.69404e-06	6	18
V	387228	438340	1.3396e-07	9.69404e-06	7	30
V	387228	397649	5.17806e-05	0.000257777	3	6
V	387228	390048	0.000194401	0.000781014	2	2
V	417277	422442	0.000194401	0.000781014	2	2
IV	425999	430923	0.000577863	0.00194604	2	3
IX	193592	264891	0.000571187	0.00194604	5	49
IV	1353717	1478349	0.000644148	0.00210728	6	76
IX	246389	264891	0.000868498	0.00272447	3	14
XV	69376	115808	0.00108676	0.00331823	4	33
IX	257842	264891	0.00114516	0.00345054	2	4
IX	193592	200116	0.00189116	0.005095	2	5
V	551468	560360	0.00189116	0.005095	2	5
XV	461504	466545	0.00189116	0.005095	2	5
X	419849	458354	0.00385644	0.00901147	3	23
IV	1353717	1365654	0.00515172	0.0109236	2	8
VII	542207	553955	0.00515172	0.0109236	2	8
X	419849	432194	0.00515172	0.0109236	2	8
XV	87844	103229	0.00656338	0.0135407	2	9
IV	1468218	1478349	0.00812967	0.0164752	2	10
IV	1412365	1430781	0.0117081	0.0211115	2	12
X	191021	209525	0.0117081	0.0211115	2	12
IV	1068725	1093583	0.015852	0.0257455	2	14
XIII	78335	99400	0.015852	0.0257455	2	14
XII	790676	817761	0.0257032	0.0379745	2	18
XVI	600646	728613	0.0287201	0.0408504	4	83
91 genes identified in 2+ independent studies Positional Gene Enrichment
Chr	Chr Numeral	BP Start	BP End	p-value raw	p-value adjusted	Elements ID	Total Elements in Region
I	1	110847	171698	0.0108593	0.0293495	3	36
II	2	442918	575991	0.00338088	0.0160766	5	79
II	2	442918	454524	0.00556995	0.0192067	2	9
III	3	229306	232959	0.000164105	0.00472814	2	2
III	3	170882	186019	0.00330413	0.0160766	2	7
III	3	74704	95763	0.011671	0.0299257	2	13
IV	4	174919	181040	0.000488178	0.00610223	2	3
IV	4	251566	281848	0.0196823	0.0389547	2	17
IV	4	598465	628531	0.0219593	0.0414326	2	18
IV	4	1451345	1476468	0.0219593	0.0414326	2	18
V	5	387228	396168	2.0294e-05	0.0020294	3	5
V	5	387228	390048	0.000164105	0.00472814	2	2
VI	6	56335	63992	0.000488178	0.00610223	2	3
VII	7	187470	196409	0.00238001	0.0143559	2	6
IX	9	83302	100501	0.011671	0.0299257	2	13
X	10	491074	517506	0.000418138	0.00610223	3	12
X	10	491074	497002	0.000488178	0.00610223	2	3
X	10	196285	209525	0.00330413	0.0160766	2	7
XI	11	584594	595940	0.00160008	0.013334	2	5
XII	12	871452	881924	0.00556995	0.0192067	2	9
XVI	16	169769	181114	0.00556995	0.0192067	2	9
XVI	16	41043	76239	0.0268207	0.0462427	2	20
Table S7. Positional Gene Enrichment analysis of the 217 MAT Top Hits, 100 MAT + MET15 Top hits, and 91 genes identified in 2+ independent studies All chromosomal regions reported from PGE analysis are included with basepair positioning and adjusted p-values. Further the number of elements identified and the total number of elements in the region are reported.
